# Supplementary material for: Rational engineering of a native hyperthermostable lactonase into a broad spectrum phosphotriesterase
Source: PubMed Central journal article supplement (PMC5711954; doi:10.1038/s41598-017-16841-0), 2017-12-01
Supplement: 41598_2017_16841_MOESM1_ESM.pdf [file 41598_2017_16841_MOESM1_ESM.pdf]

## SUPPLEMENTARY DATA

# **Rational engineering of a native hyperthermostable lactonase into a broad spectrum phosphotriesterase**

Pauline Jacquet<sup>1°</sup>, Julien Hiblot<sup>1+°</sup>, David Daudé<sup>2°</sup>, Céline Bergonzi<sup>1,3</sup>, Guillaume Gotthard<sup>1</sup>, Nicholas Armstrong<sup>1</sup>, Eric Chabrière<sup>1#</sup>, Mikael Elias<sup>3#</sup>

1 - CNRS UMR 7278, IRD198, INSERM U1095, APHM, Institut Hospitalier Universitaire Méditerranée-Infection, Aix-Marseille Université, 19-21 Bd Jean Moulin 13005 Marseille, France.

2 - Gene&GreenTK, IHU Méditerranée Infection, 19-21 Bd Jean Moulin, 13005 Marseille, France

3 - University of Minnesota, Department of Biochemistry, Molecular Biology and Biophysics & Biotechnology Institute, St. Paul, MN 55108, USA

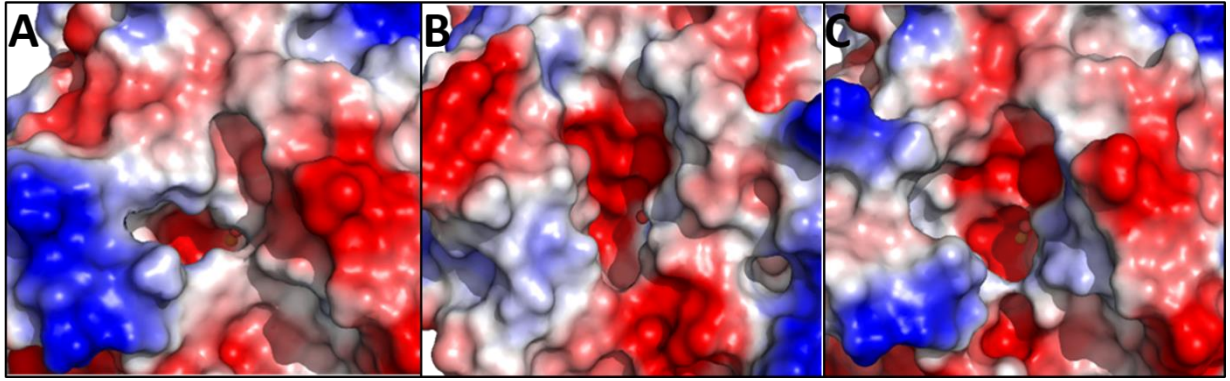

**Figure S1: Structure-based active site cavity redesign.** Active site cavity view of (A) *wt SsoPox*, (B) *BdPTE* and (C) *SsoPox* modelled with all 14 designed mutations (Table S1). The mutations modelled were constructed *in silico* and energy was minimized using *Swiss PDB viewer*.<sup>59</sup> Electrostatic potentials were calculated using *PyMOL*<sup>60</sup> and are shown on the molecular surface. Electrostatic potentials are represented at the enzyme's surfaces. Blue, red and white indicates positively-, negatively-, and neutrally-charged areas, respectively.

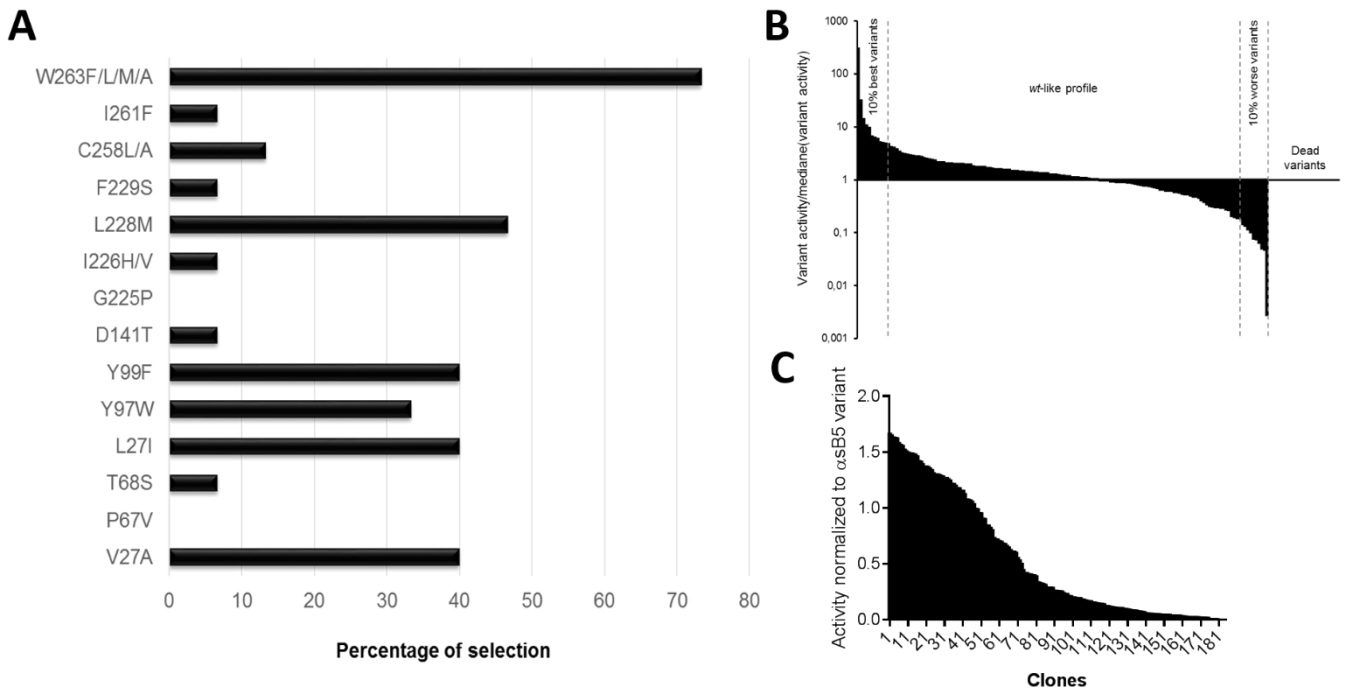

**Figure S2: Library screening data.** (A) Occurrence of mutations in the 14 best sequenced clones. (B) Screening profile of the combinatorial mutation library (184 clones) with paraoxon as a substrate. Activities ( $\text{mOD}_{405\text{nm}} \text{min}^{-1}$ ) were normalized to the median value. (C) Screening of the position 263 saturation library ( $\alpha\text{B5}$  background) with paraoxon as the substrate. Activity was normalized to  $\alpha\text{B5}$  paraoxonase activity.

### Fluorescence range

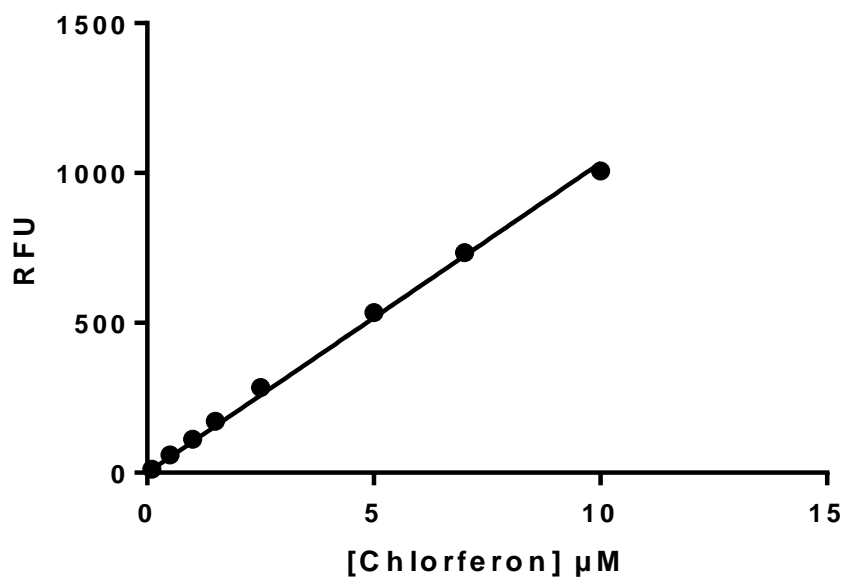

| Best-fit values |                       |
|-----------------|-----------------------|
| Slope           | $103,3 \pm 0,6551$    |
| Equation        | $Y = 103,3 * X - 0,0$ |
| R <sup>2</sup>  | 0.9975                |

**Figure S3. Chlorferon vs Fluorescence (360 (40) / 460 (40)) range of linearity**

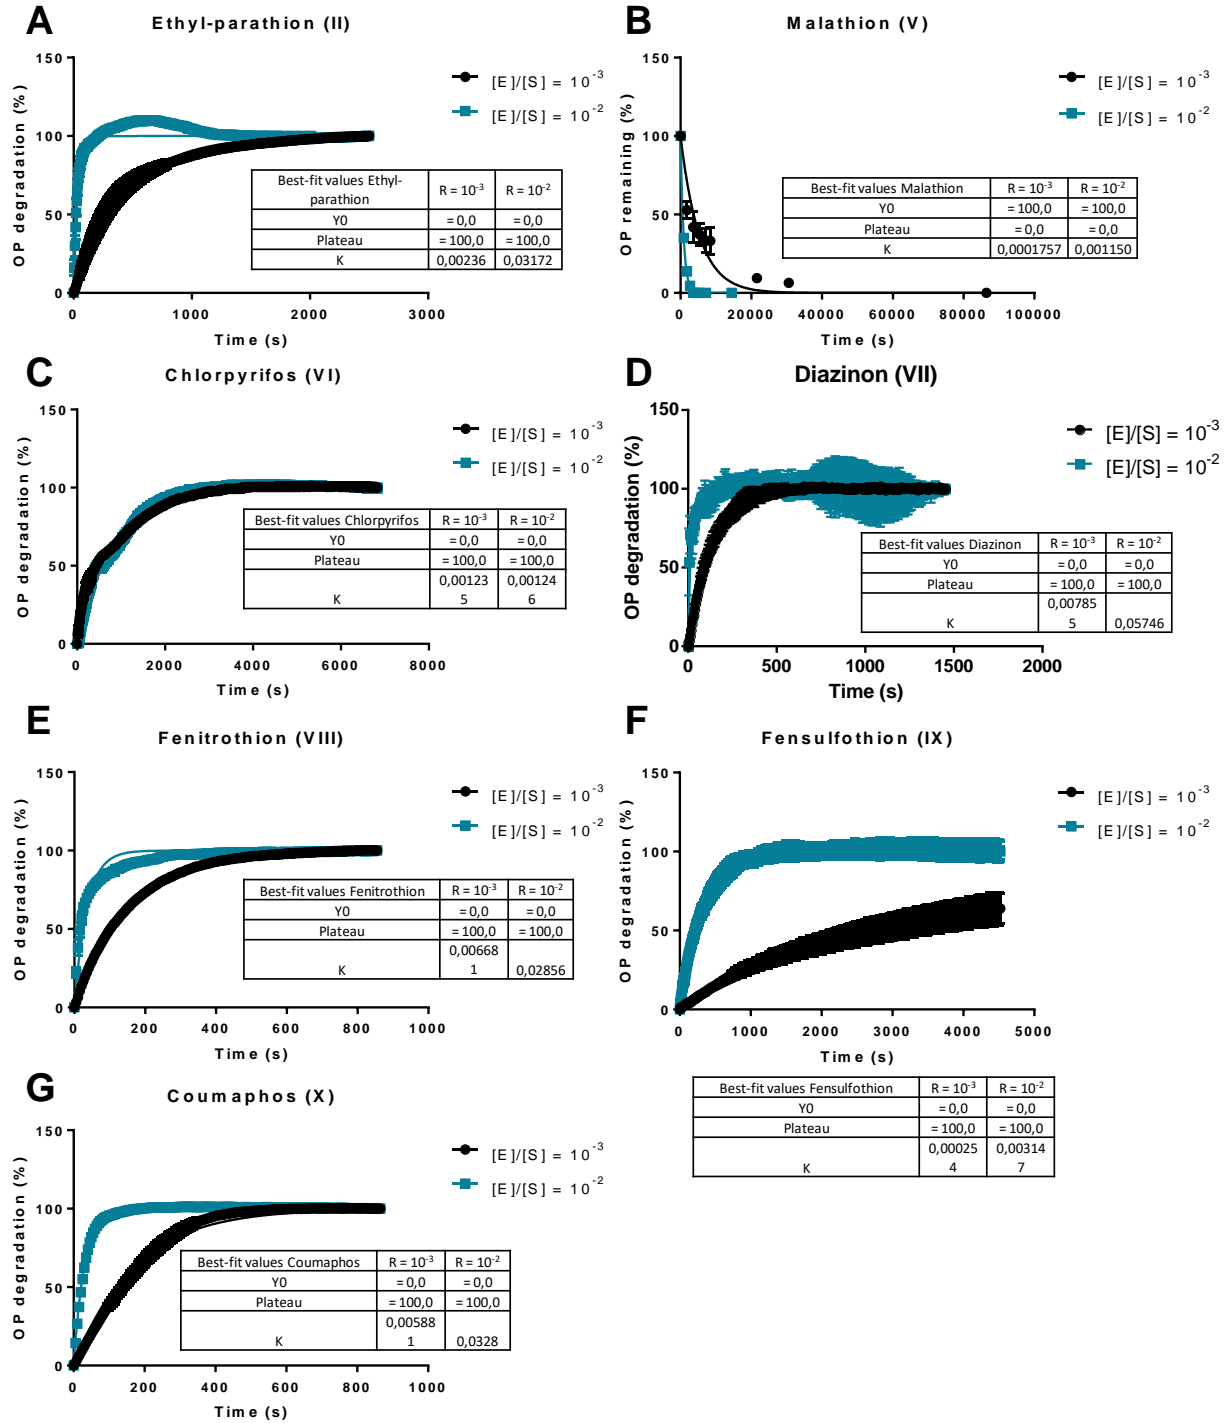

**Figure S4. Bioremediation of organophosphorus insecticides (250  $\mu$ M)**

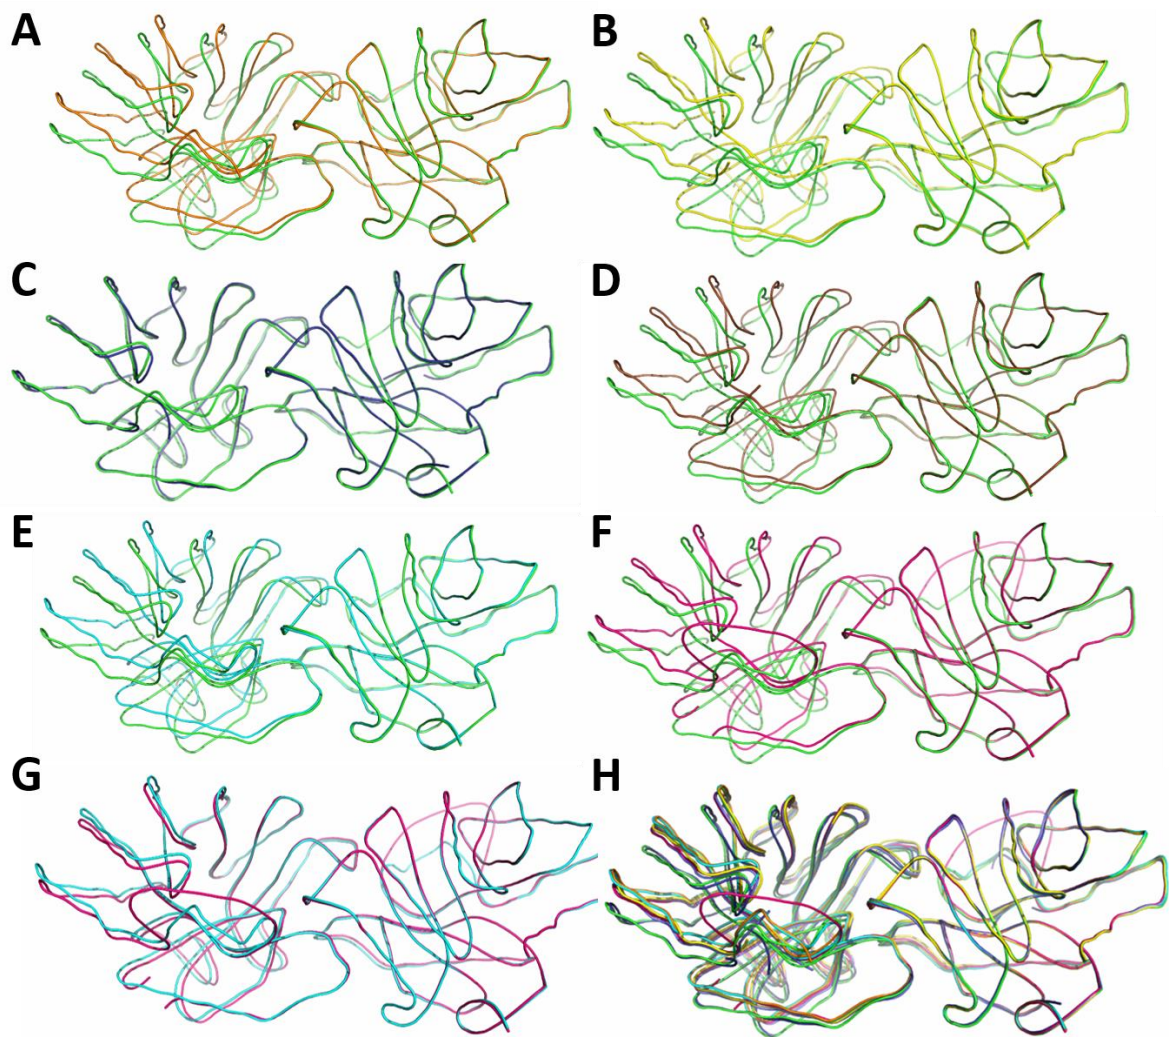

**Figure S5. Structural superposition of wt-*SsoPox* and mutants dimers.** The monomers on the right were superimposed, and the difference with the left monomers indicates the relative reorientation of dimerized monomers. **(A)** Superposition of wt-*SsoPox* (green) and  $\alpha$ A1 (orange). **(B)** Superposition of wt-*SsoPox* (green) and  $\alpha$ B5 (yellow). **(C)** Superposition of wt-*SsoPox* (green) and  $\alpha$ C6 (blue). **(D)** Superposition of wt-*SsoPox* (green) and  $\alpha$ D6 (brown). **(E)** Superposition of wt-*SsoPox* (green) and  $\alpha$ A6-CC (cyan). **(F)** Superposition of wt-*SsoPox* (green) and  $\alpha$ A6-OC (magenta). **(G)** Superposition of  $\alpha$ A6-OC (magenta) and  $\alpha$ A6-CC (cyan). **(H)** Superposition of wt-*SsoPox* (green),  $\alpha$ A1 (orange),  $\alpha$ B5 (yellow),  $\alpha$ D6 (brown),  $\alpha$ C6 (blue),  $\alpha$ A6-OC (magenta) and  $\alpha$ A6-CC (cyan).

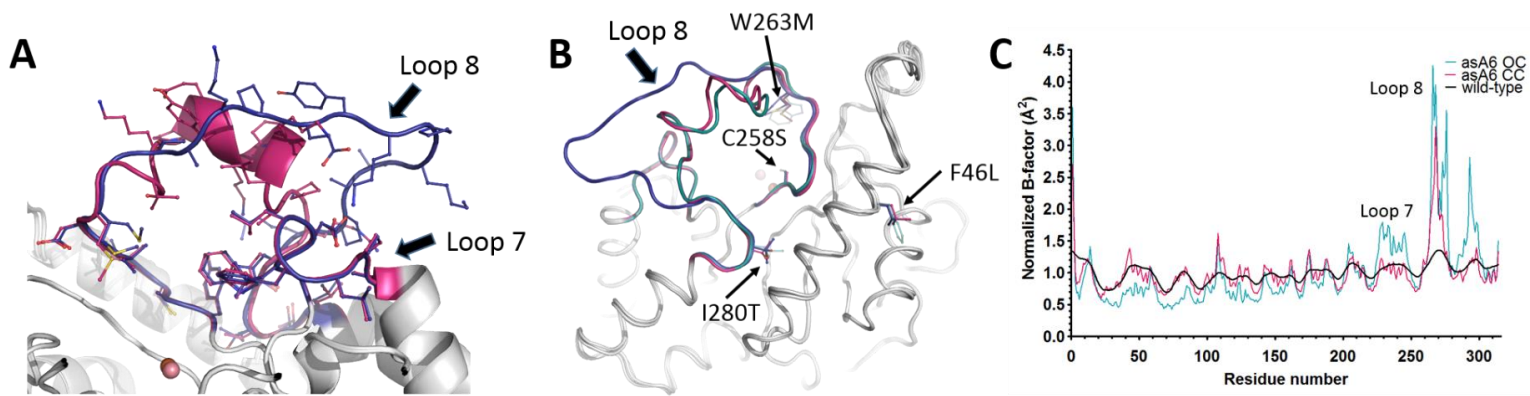

**Figure S6. Mutant  $\alpha$ A6 loop-8 conformational flexibility.** (A) Superposition of the open conformation (OC, blue) and the closed conformation (CC, magenta), of loop 8 in two distinct mutant  $\alpha$ A6 crystal structures. (B) Location of the four mutations of mutant  $\alpha$ A6 in the structure. The wt *SsoPox*, the CC, and the OC loop 8 conformations are shown in green, magenta and blue, respectively. We note that I280T and C258S are located at the very beginning and end of loop 8. (C) Positional distributions of normalized B-factor values (the x-axis represents residue number) for wt-*SsoPox* (black line),  $\alpha$ A6-OC (blue line) and (magenta line).

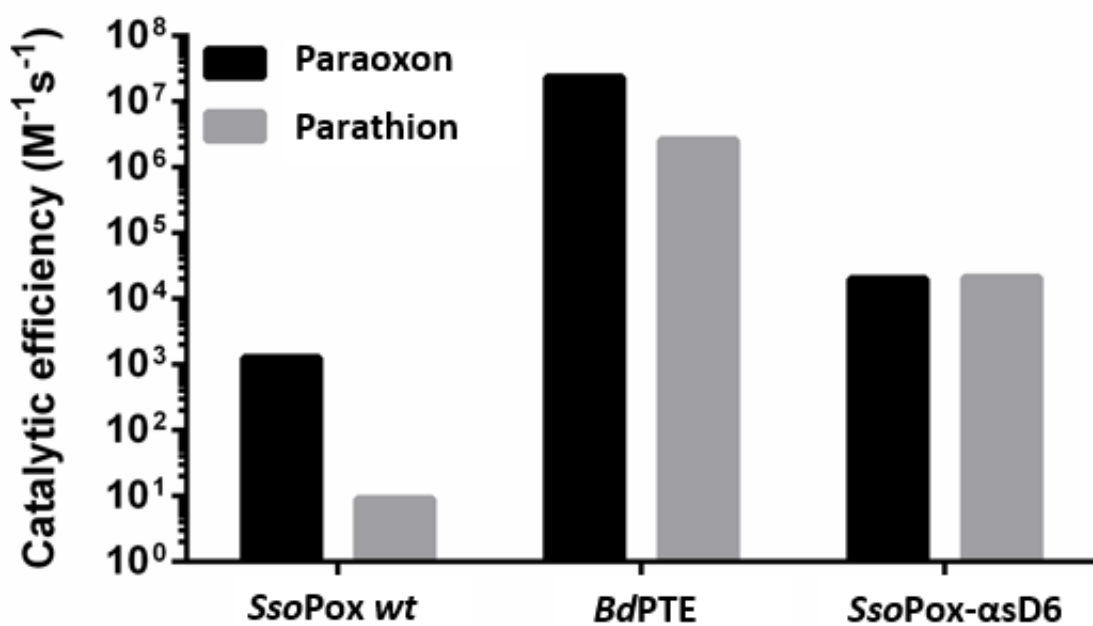

**Figure S7: Thiono-effect in *SsoPox*.** Catalytic efficiencies of enzymes, *SsoPox*, *BdPTE* and *SsoPox-αD6* with methyl-paraoxon (black) and methyl-parathion (gray) as substrates are shown.



**Table S1: Mutation database**

|                         | <i>Sso</i> Pox position | Corresponding position in <i>BdPTE</i> | Redesign | Additional mutations | Mutations in database |
|-------------------------|-------------------------|----------------------------------------|----------|----------------------|-----------------------|
| First set of mutations  | V27                     | G60                                    | -        | -                    | V27A                  |
|                         | P67                     | V101                                   | -        | -                    | P67V                  |
|                         | T68                     | S102                                   | -        | -                    | T68S                  |
|                         | L72                     | I106                                   | -        | -                    | L72I                  |
|                         | Y97                     | W131                                   | -        | -                    | Y97W                  |
|                         | D141                    | T173                                   | -        | -                    | D141T                 |
|                         | G225                    | P256                                   | -        | -                    | G225P                 |
|                         | L226                    | H257                                   | -        | -                    | L226H                 |
|                         | C258                    | L303                                   | -        | A                    | C258/A-L              |
| I261                    | F306                    | -                                      | -        | I261F                |                       |
| Second set of mutations | Y99                     | -                                      | F        | -                    | Y99F                  |
|                         | L228                    | -                                      | M        | -                    | L228M                 |
|                         | F229                    | -                                      | S        | -                    | F229S                 |
|                         | W263                    | -                                      | A        | Saturation           | W263/All              |

**Table S2: Oligonucleotide sequences used in this study**

| Primer name                   |                    | Primer sequence                                                    |                                                           |
|-------------------------------|--------------------|--------------------------------------------------------------------|-----------------------------------------------------------|
| Clonage                       | T7-prom            | TAA TAC GAC TCA CTA TAG GG                                         |                                                           |
|                               | pET-RP             | GCT AGT TAT TGC TCA GCG G                                          |                                                           |
|                               | SsoPox-lib-pET-5'  | CAT GCC ATG GCG CGC ATT CCG CTG GTT GGT AAA G                      |                                                           |
|                               | SsoPox-lib-pET-3'  | AAG GAA AAA AGC GGC CGC TTA TTA GCT AAA GAA<br>TTT TTT CGG ATT TTC |                                                           |
| Primer name                   | Encoding variation | Primer sequence                                                    |                                                           |
| Primers used in ISOR protocol | SP1                | V27A                                                               | GAA CAT CTG CGT <b>GCA</b> TTT AGC GAA GCA GTT            |
|                               | SP2                | P67V-T68S                                                          | AAA ACC ATT GTT GAT <b>GTG AGT</b> GTT ATG GGT            |
|                               | SP3                | P67V                                                               | AAA ACC ATT GTT GAT <b>GTG</b> ACC GTT ATG GGT            |
|                               | SP4                | T68S                                                               | AAA ACC ATT GTT GAT CCG <b>AGT</b> GTT ATG GGT            |
|                               | SP5                | L72I                                                               | GTT ATG GGT <b>ATT</b> GGT CGT GAT ATT CGT TTT            |
|                               | SP6                | Y97W-Y99F                                                          | GGC ACC GGT ATT <b>TGG</b> ATT <b>TTT</b> ATC GAT CTG CCG |
|                               | SP7                | Y97W                                                               | GGC ACC GGT ATT <b>TGG</b> ATT TAT ATC GAT CTG CCG        |
|                               | SP8                | Y99F                                                               | GGC ACC GGT ATT TAT ATT <b>TTT</b> ATC GAT CTG CCG        |
|                               | SP9                | D141T                                                              | AAA ATT GCA GCC <b>ACC</b> GAA CCG GGT ATT ACC            |
|                               | SP10               | L226H-228L/M-229F/S                                                | GAT CGT TAT GGT <b>CAC</b> GAC <b>MTG TYT</b> CTG CCG GTT |
|                               | SP11               | L226V-228L/M-229F/S                                                | GAT CGT TAT GGT <b>GTG</b> GAC <b>MTG TYT</b> CTG CCG GTT |
|                               | SP12               | G225P-228L/M-229F/S                                                | GAT CGT TAT <b>CCG</b> CTG GAC <b>MTG TYT</b> CTG CCG GTT |
|                               | SP13               | G225P-L226H-228L/M-229F/S                                          | GAT CGT TAT <b>CCG CAC</b> GAC <b>MTG TYT</b> CTG CCG GTT |
|                               | SP14               | G225P-L226V-228L/M-229F/S                                          | GAT CGT TAT <b>CCG GTG</b> GAC <b>MTG TYT</b> CTG CCG GTT |
|                               | SP15               | 228L/M-229F/S                                                      | GAT CGT TAT GGT CTG GAC <b>MTG TYT</b> CTG CCG GTT        |
|                               | SP16               | C258L                                                              | ATT AGC CAT GAT TAT <b>CTG</b> TGC ACC ATT GAT            |
|                               | SP17               | C258A                                                              | ATT AGC CAT GAT TAT <b>GCC</b> TGC ACC ATT GAT            |
|                               | SP18               | I261F                                                              | GAT TAT TGC TGC ACC <b>TTT</b> GAT TGG GGC ACC            |
|                               | SP19               | W263F                                                              | TGC ACC ATT GAT <b>TTT</b> GGC ACC GCA AAA CCG            |
|                               | SP20               | W263M                                                              | TGC ACC ATT GAT <b>ATG</b> GGC ACC GCA AAA CCG            |
|                               | SP21               | W263L                                                              | TGC ACC ATT GAT <b>CTG</b> GGC ACC GCA AAA CCG            |
|                               | SP22               | W263A                                                              | TGC ACC ATT GAT <b>GCG</b> GGC ACC GCA AAA CCG            |

**Table S3: Selected positions for phosphotriesterase activity improvement**

| Position             | 27  | 67 | 68   | 72  | 97   | 99  | 141  | 225 | 226  | 228  | 229  | 258  | 261  | 263  | Additional | Total variations                          |
|----------------------|-----|----|------|-----|------|-----|------|-----|------|------|------|------|------|------|------------|-------------------------------------------|
| wt                   | V   | P  | T    | L   | Y    | Y   | D    | G   | I    | L    | F    | C    | I    | W    |            |                                           |
| B3                   | A   |    |      | I   | W    |     |      |     |      | M    |      |      |      |      |            | V27A/L72I/Y97W/L228M                      |
| F2                   |     |    |      |     |      |     |      |     |      | M    |      |      |      | L    |            | L228M/W263L                               |
| F8                   |     |    |      | I   |      |     |      |     |      |      |      |      |      | M    | K54I       | K54I/L72I/W263M                           |
| B2                   | A   |    |      | I   |      | F   | T    |     |      | M    |      |      |      | M    | G7S/V28A   | G7S/V27A/V83A/L72I/Y99F/D141T/L228M/W263M |
| H8                   |     |    | S    |     | W    | F   |      |     |      | M    |      |      |      |      |            | T68S/Y97W/Y99F/L228M/                     |
| E3                   | A   |    |      | I   |      |     |      |     |      |      |      |      |      | M    | V83A/E173T | V27A/L72I/V83A/E173T/W263M                |
| A4                   |     |    |      |     |      | F   |      |     |      | M    |      |      |      | M    | G193S      | Y99F/G193S/L228M/W263M                    |
| A1                   |     |    |      |     |      |     |      |     |      |      |      | L    | F    | A    |            | C258L/I261F/W263A                         |
| A6                   |     |    |      |     |      |     |      |     |      |      |      | A    |      | M    | F46L/I280T | F46L/C258A/W263M/I280T                    |
| B5                   | A   |    |      |     | W    | F   |      |     | V    |      |      |      |      |      | I76T/L130P | V27A/I76T/Y97W/Y99F/L130P/L226V           |
| C6                   |     |    |      | I   |      | F   |      |     |      | M    | S    |      |      | L    | I122L      | L72I/Y99F/I122L/L228M/F229S/W263L         |
| D6                   | A   |    |      |     | W    |     |      |     |      | M    |      |      |      | M    |            | V27A/Y97W/L228M/W263M                     |
| D1                   |     |    |      |     | W    |     |      |     |      |      |      |      |      |      |            | Y97W                                      |
| D5                   |     |    |      | I   |      |     |      |     |      |      |      |      |      | F    |            | L72I/W263F                                |
| A5                   | A   |    |      |     |      | F   |      |     |      |      |      |      |      | L    |            | V27A/L72I/Y99F/W263L                      |
| <b>Incorporation</b> | 6   | 0  | 1    | 6   | 5    | 6   | 1    | 0   | 1    | 7    | 1    | 2    | 1    | 11   |            |                                           |
| <b>Ratio</b>         | 0.4 | 0  | 0.07 | 0.4 | 0.33 | 0.4 | 0.07 | 0   | 0.07 | 0.47 | 0.07 | 0.13 | 0.07 | 0.73 |            |                                           |

**Table S4: T<sub>m</sub> values of SsoPox variants**

| Enzyme            | Mutations                             | T <sub>m</sub> (°C) |
|-------------------|---------------------------------------|---------------------|
| <i>wt</i>         | *                                     | 106                 |
| <b>αsD6</b>       | V27A/Y97W/L228M/W263M                 | 82.5 ± 1,8          |
| <b>αsB5</b>       | V27A/I76T/Y97W/Y99F/L130P/L226V       | 70.4 ± 3,1          |
| <b>αsB5 W263M</b> | V27A/I76T/Y97W/Y99F/L130P/L226V/W263M | 69.1 ± 2,3          |
| <b>αsB5 W263L</b> | V27A/I76T/Y97W/Y99F/L130P/L226V/W263L | 80.2 ± 4,0          |
| <b>αsB5 W263I</b> | V27A/I76T/Y97W/Y99F/L130P/L226V/W263I | 77.9 ± 1,3          |
| <b>W263M</b>      | W263M                                 | 85.3 ± 0,9          |
| <b>W263L</b>      | W263L                                 | 92.0 ± 2,1          |

**Melting temperature determination.** Circular Dichroism (CD) spectra were obtained using a Jasco J-815 CD spectrometer with a Pelletier-type temperature control system (Jasco MPTC-490S) in a 1 mm thick quartz Starna® cell and using Spectra Manager software. Experiments were carried out in 10 mM phosphate buffer at pH 8.0. Proteins concentrations were within 0.2–0.4 mg.mL<sup>-1</sup>, denaturation was followed at 222 nm with temperature increased from 25 to 85°C (with 5°C.min<sup>-1</sup> increment). A range of between 0.5 and 3 M of guanidinium chloride in 10 mM phosphate buffer at pH 8.0 was applied. Data were analyzed with GraphPad Prism 6 using Boltzmann sigmoidal equation, and T<sub>m</sub> at 0 M of guanidinium chloride was then extrapolated by linear regression.

### **Thermal stability of the engineered variants**

We measured the melting temperature of variants  $\alpha$ S<sub>D6</sub>,  $\alpha$ S<sub>B5</sub>,  $\alpha$ S<sub>B5-W263L</sub>,  $\alpha$ S<sub>B5-W263M</sub> and  $\alpha$ S<sub>B5-W263I</sub> in this study while the T<sub>m</sub> values of *wt*, W263M and W263L were previously reported (**Table S4**).<sup>7</sup> All variants showed decreased T<sub>m</sub> values as compared to the wild-type enzyme. These values ranged from 69 °C to 92 °C for  $\alpha$ S<sub>B5-W263M</sub> and W263L, respectively. As previously reported, the role of residue 263 is crucial for overall enzyme stability. The stability of mono-substituted variants was globally less affected than the  $\alpha$ S<sub>D6</sub> and  $\alpha$ S<sub>B5</sub> scaffolds. The latter's T<sub>m</sub> value decreased by 36 °C as compared to *SsoPox*-WT, while the addition of a mutation at position W263 to its background was not destabilizing, suggesting that their contribution to stability may be different. While the T<sub>m</sub> values for the best variants have decreased, they remain very stable (e.g.  $\alpha$ S<sub>D6</sub> has a T<sub>m</sub> of 82.5°C), as compared with their mesophilic counterparts (T<sub>m,BdPTE</sub>=67°C).<sup>61</sup> Additionally, the expression level of the *SsoPox* and its mutants were  $\approx$ 100-150 mg.l<sup>-1</sup><sub>culture</sub>, a higher level than the *BdPTE* ( $\approx$ 3 mg.l<sup>-1</sup><sub>culture</sub>) and  $\approx$ 50 mg.l<sup>-1</sup><sub>culture</sub> for the improved *BdPTE*-S5 variant.<sup>61</sup>

Interestingly, the range of recognized substrate was broadened when thermostability decreased which is consistent with previous reports suggesting that mutations often increase activity at the cost of stability (**Figure 7**).<sup>62,63</sup>
